# Supplementary material for: Facile eco-friendly treatment of a dye wastewater mixture by in situ hybridization with growing calcium carbonate
Source: Royal Society of Chemistry journal article supplement (doi:10.1039/b911830f), 2009-01-01
Supplement: b911830f.pdf [file b911830f.pdf]

**B911830F**

**Electronic Supplementary Information (ESI): Fig. S1-S8**

Facilely eco-friendly treatment of dye wastewater mixture by  
*in-situ* hybridization with growing calcium carbonate

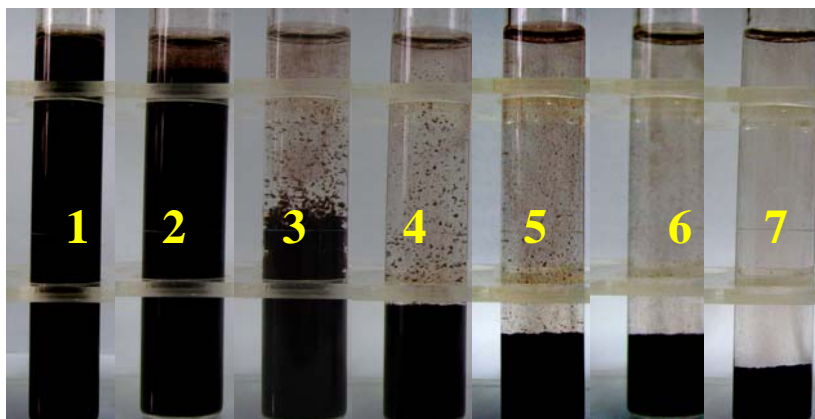

**Fig. S1** Sedimentation time of the CR-MB conjugate -  $\text{CaCO}_3$  hybrid particles in the presence of  $300 \mu\text{M}$  CR,  $500 \mu\text{M}$  MB,  $0.006 \text{ M}$   $\text{CO}_3^{2-}$  and  $0.012 \text{ M}$   $\text{Ca}^{2+}$ . From 1 to 7: 0, 5, 10, 15, 20, 30 and 60 min.

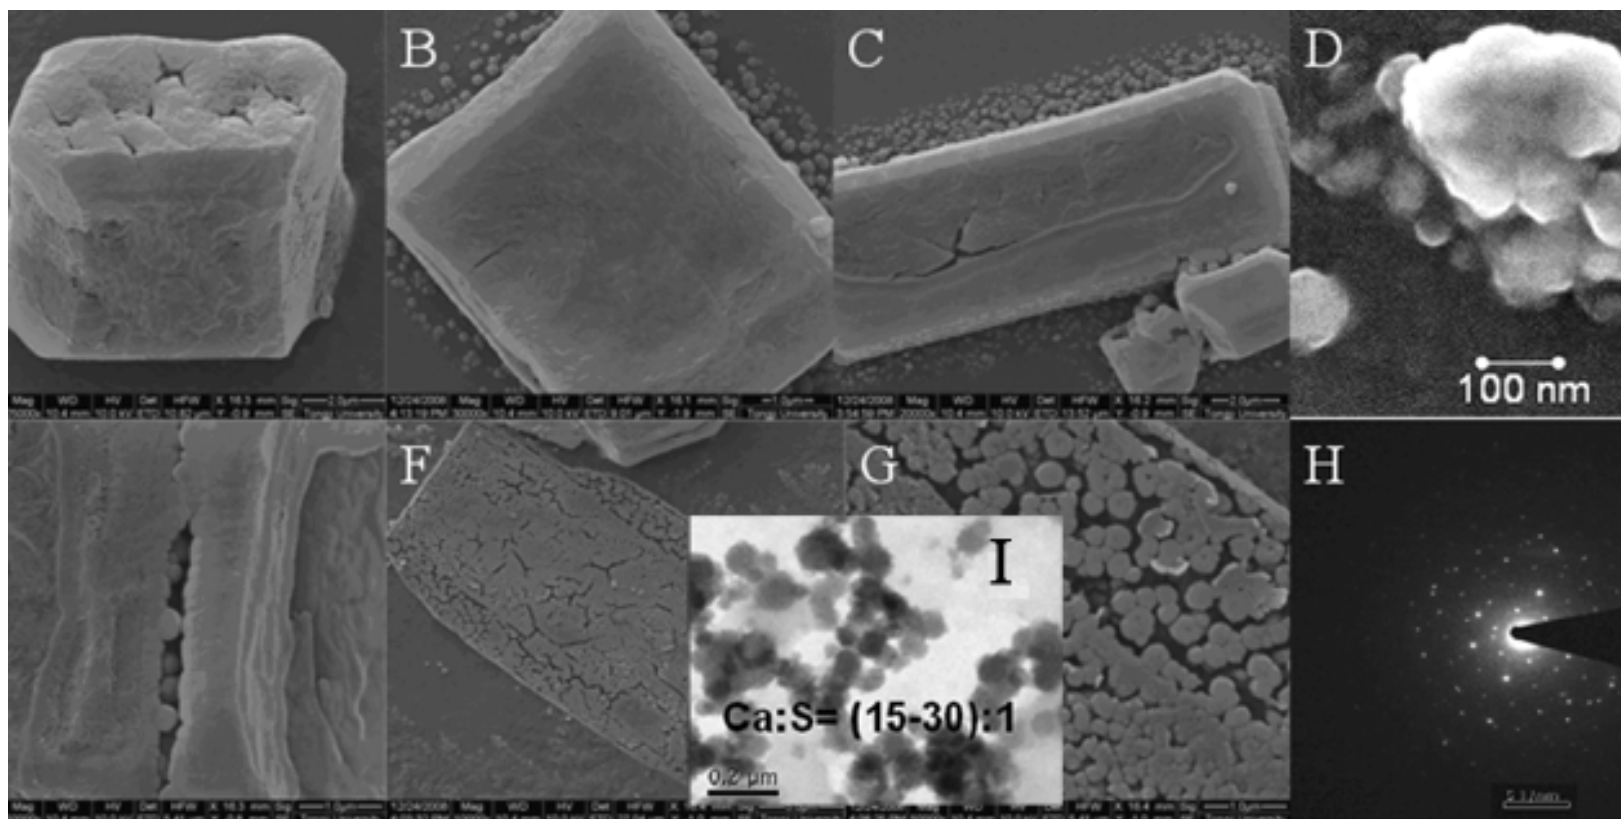

**Fig. S2** SEM images of growing CR - MB conjugate -  $\text{CaCO}_3$  hybrid (A, B, C, E- the differential morphology of encapsulation of particles; D: the sticky nanosphere of the CR -MB conjugate formed; F: an un-encapsulated closed-packed monolayer of growing particles and its partial enlarged detail (G); H: the electronic diffraction pattern of a particle; I: Ca and S analysis of the scattered CR - MB conjugate -  $\text{CaCO}_3$  hybrid particles.

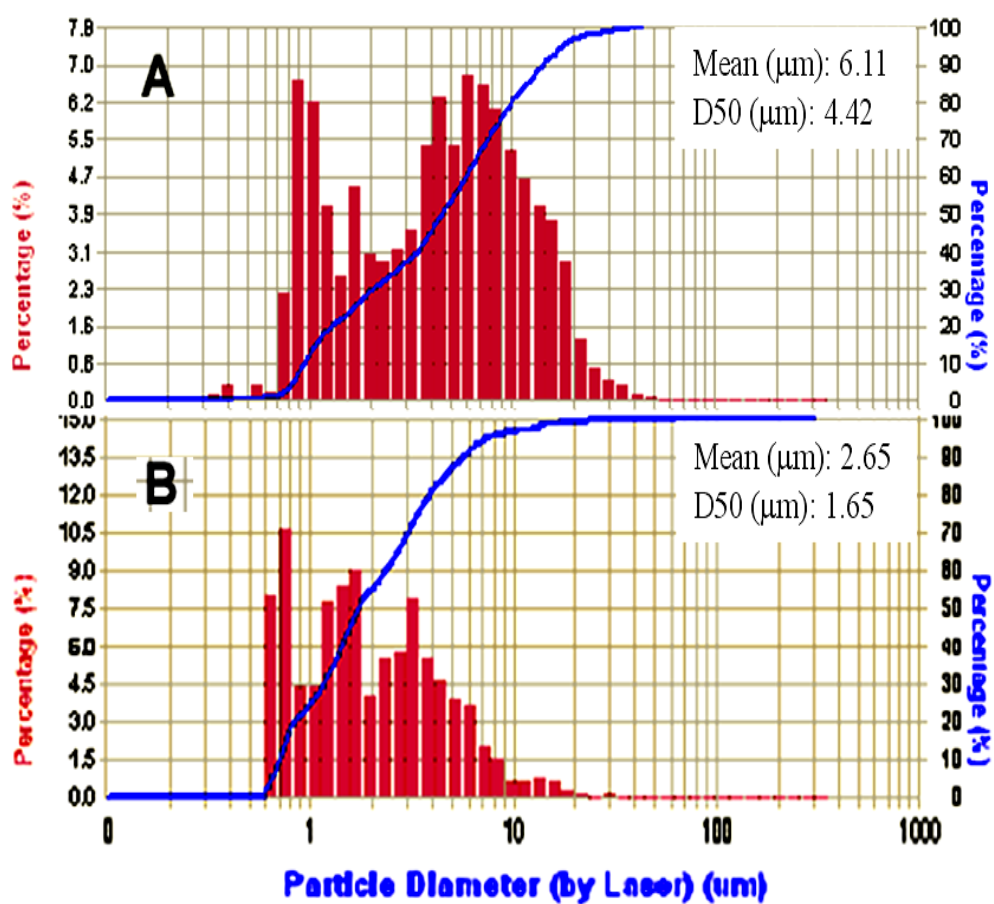

**Fig. S3** Particle size distribution of  $\text{CaCO}_3$  –only (A) and its CR-MB conjugate hybrid (B)

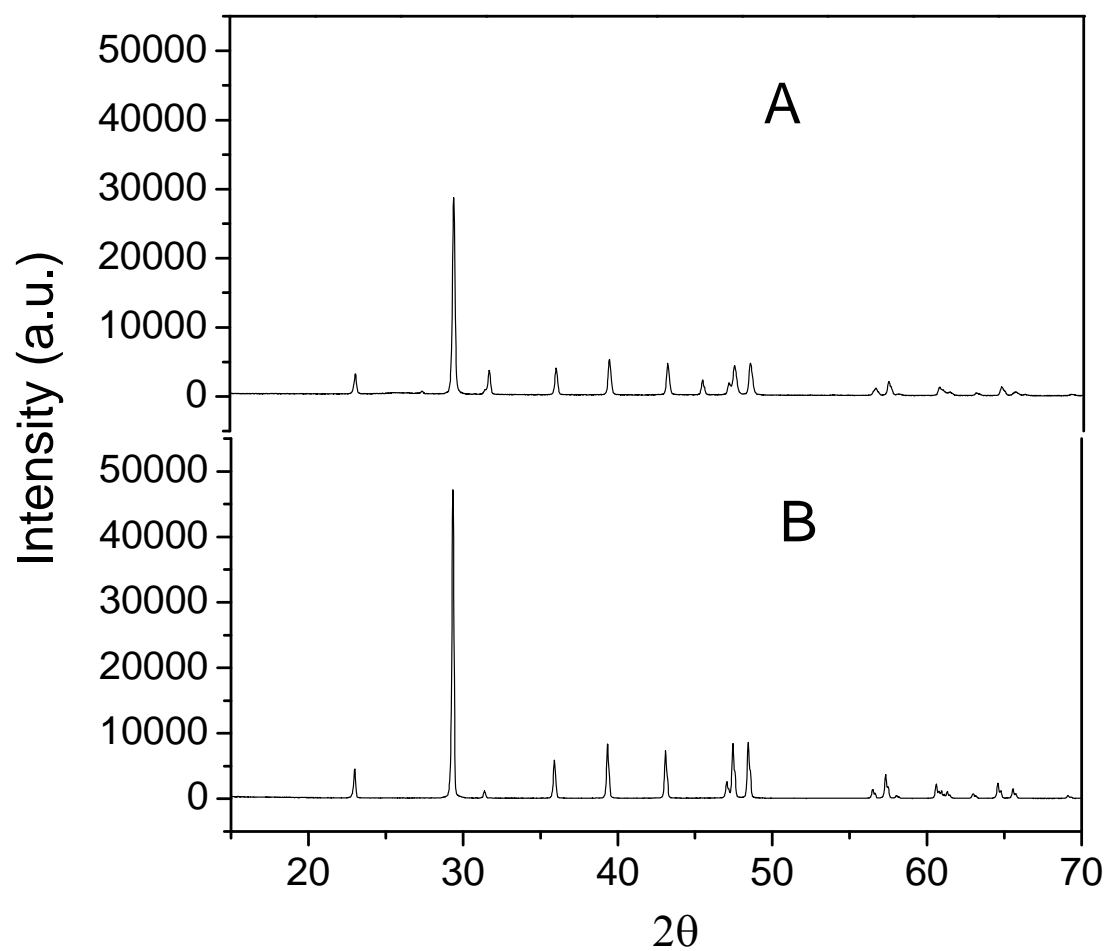

**Fig. S4** XRDs of the CR-MB conjugate-CaCO<sub>3</sub> hybrid (A) and CaCO<sub>3</sub> (B)

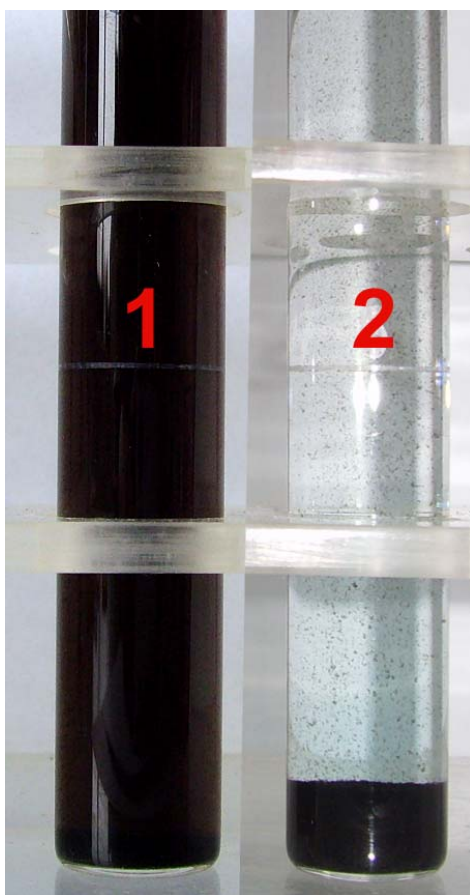

**Fig. S5** The  $\text{CaCO}_3$  surface-modifying CR and MB material was prepared by adding CR and MB into a  $\text{CaCO}_3$  powder liquid, thus both CR and MB were adsorbed on the outside surface of  $\text{CaCO}_3$  powder particles. The suspending substance was washed with distilled water (1). The CR-MB conjugate –  $\text{CaCO}_3$  hybrid was prepared according to the present work and washed with distilled water (2). The concentrations were  $200\ \mu\text{M}$  CR,  $400\ \mu\text{M}$  MB and  $0.06\%$   $\text{CaCO}_3$  and both the water-washing liquids were settled naturally for 30 min.

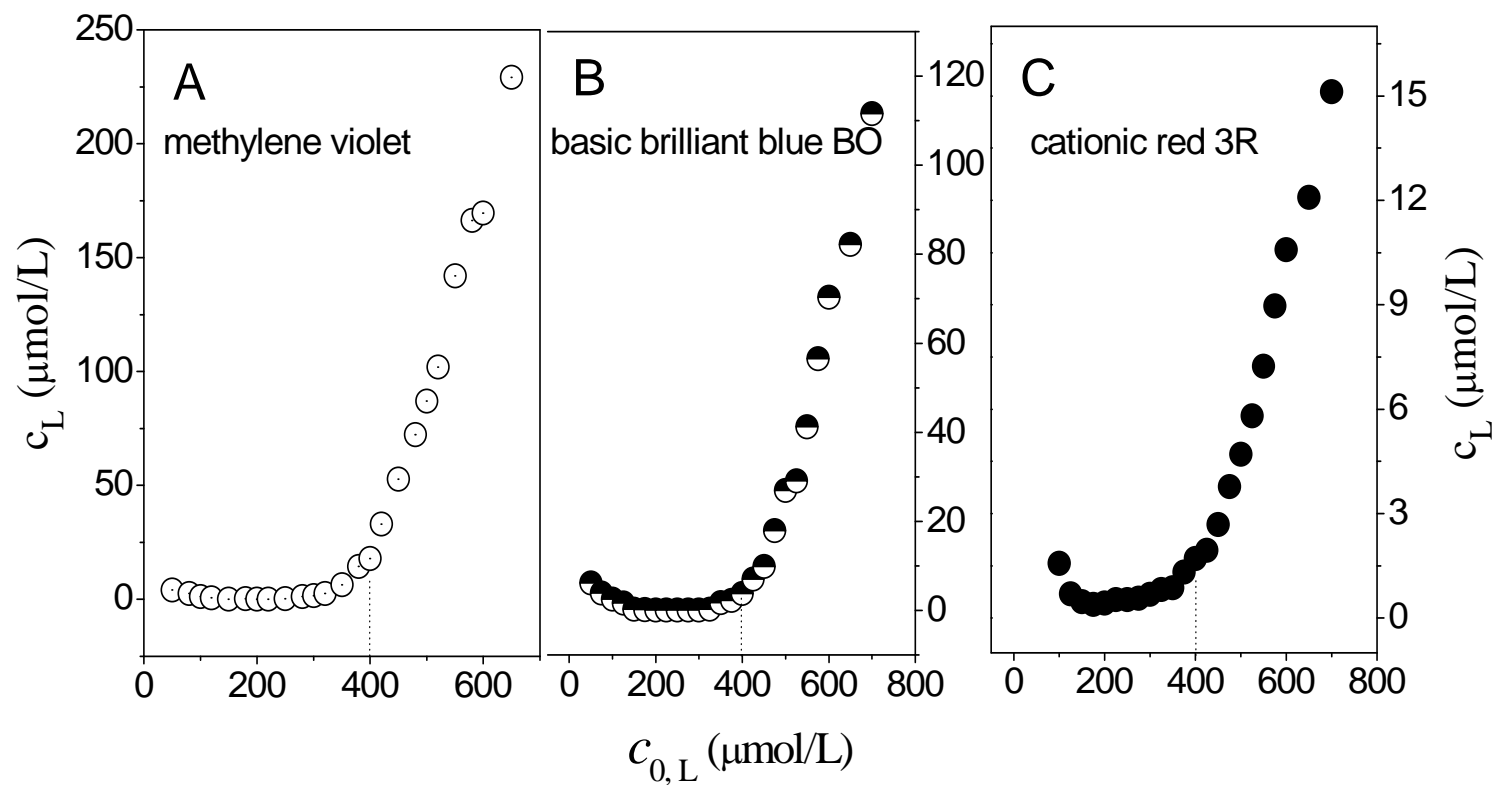

**Fig. S6** Change of the equilibrium concentration of methylene violet (A), basic brilliant blue BO (B) and cationic red 3R (C). All the solutions contained 200  $\mu\text{M}$  CR and were treated with growing  $\text{CaCO}_3$  (0.06%). The CR- $\text{L}_2$  complex (L: cationic dye) was formed at the mole ratio of CR to L being 1:2.

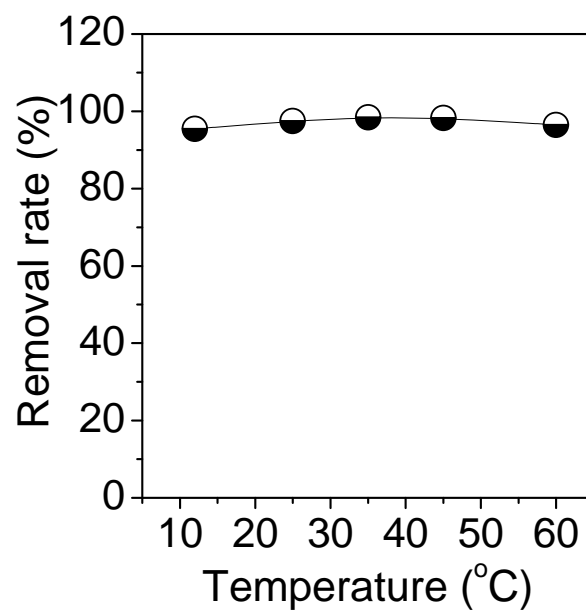

**Fig.S7** Effect of temperature on the synergetic in situ coprecipitation of the mixed dyes solution of CR (300  $\mu\text{M}$ ) and MB (500  $\mu\text{M}$ ) in the presence of 0.06%  $\text{CaCO}_3$

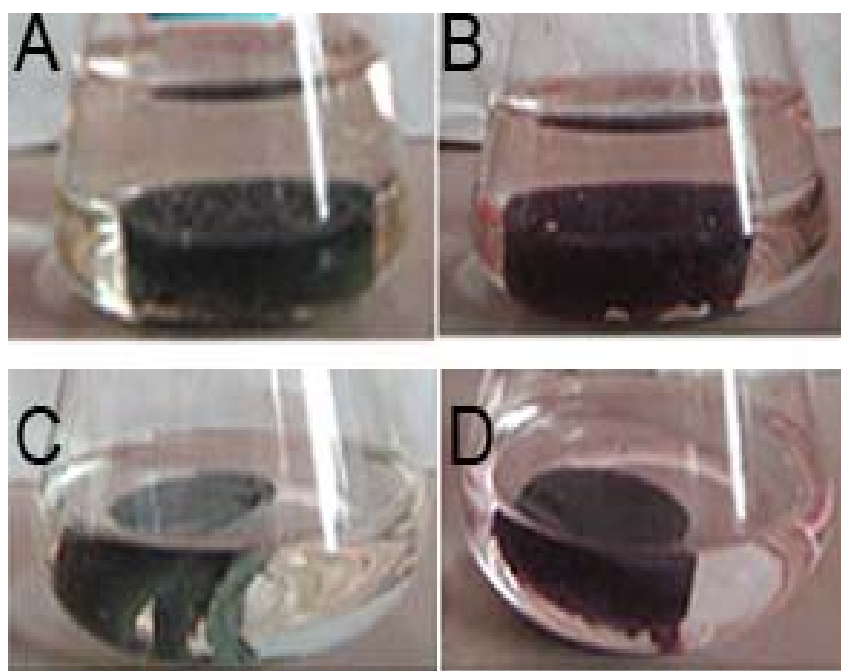

**Fig. S8** The cylindrical plastic products in which the CR-MB conjugate – CaCO<sub>3</sub> hybrid (A and C) and the CR-MB mixture (B and D) were added as the color substance were immersed in the neutral aqueous medium (A and B) and 0.1 M NaOH (C and D) for 24 h.
